# Supplementary material for: Rapid range shifts and megafaunal extinctions associated with late Pleistocene climate change
Source: PubMed Central journal article supplement (PMC7265304; doi:10.1038/s41467-020-16502-3), 2020-06-02
Supplement: 41467_2020_16502_MOESM4_ESM.pdf [file 41467_2020_16502_MOESM4_ESM.pdf]

### **Description of Additional Supplementary Files**

File name: Supplementary Data 1

File name: ASV table for vertebrate data, including information on taxonomic assignments for each read.

File name: Supplementary Data 2

File name: ASV table for plant data, including information on taxonomic assignments for each read.

File name: Supplementary Data 3

File name: Taxa identified, vertebrates. Counts indicate number of replicates in which each taxon was identified. \*Common contaminants.

File name: Supplementary Data 4

File name: Taxa identified, plants. Counts indicate presence (1) or absence (0) of a taxon.
